# Supplementary material for: Continuous neuromuscular blockade infusion for out-of-hospital cardiac arrest patients treated with targeted temperature management: A multicenter randomized controlled trial
Source: PLoS One. 2018 Dec 17;13(12):e0209327. doi: 10.1371/journal.pone.0209327 (PMC6296517; doi:10.1371/journal.pone.0209327)
Supplement: S4 File — (XLSX) [file pone.0209327.s004.xlsx]

## Sheet: Sheet1
				Medical history										cardiac arrest characteristics
Random Number	Group	age	sex	AMI	Angina	CHF	TIA_or_Stroke	HTN	DM	Pulmonary	Renal	malignancy	smoking	witness	bystanderCPR	Rhythm	Downtime	etiology	SBP	DBP	GCS_E	GCS_V	GCS_M	SOFA	SHOCK	STEMI	Glucose	pH	PCO2	PO2	HCO3	BE	seizure	Laca_0	PaO2_0	FiO2_0	Lact_12	PaO2_12	FiO2_12	Lact_24	PaO2_24	FiO2_24	Lact_36	PaO2_36	FiO2_36	survival at Discharge	CPC at discharge	MRS at discharge	MRC scale
1	NMB	75	male	no	no	no	no	no	yes	yes	no	yes	no	yes	no	PEA	37	other	200	133	1	1	3	4	no	no	311	6.709	132	93	15.7	-27.4	yes	4.2	71	0.4	4.1	85.8	0.4	6.7	81.2	0.5	4.7	87.8	0.6	no	5	6	0
2	standard	44	female	no	no	no	no	no	no	no	no	no	no	yes	yes	Vf	33	cardiac	119	99	1	1	1	4	no	no	365	6.865	64.3	49	11	-25.8	no	9.6	101	1	5.6	93.4	0.4	4	94.1	0.4	1.3	57.9	0.4	yes	1	0	60
4	standard	50	female	no	no	no	no	no	no	no	no	no	no	no	yes	Asystole	35	hanging	133	48	1	1	1	4	no	no	387	6.965	76.4	67	16.5	-16.6	no	11.1	67	0.2	5.1	174	0.4	2.7	165	0.3	0.6	142	0.3	no	5	6	0
5	NMB	76	female	no	no	no	no	yes	no	yes	no	no	no	yes	no	PEA	38	asphyxia	166	54	1	1	1	4	no	no	285	6.7	141	77	16.3	-24.9	no	7.2	49	1	4.8	83.2	0.6	4	138	0.6	3	98	0.6	no	5	6	0
6	standard	43	male	no	no	no	no	no	no	no	no	no	no	no	yes	Asystole	37	hanging	102	60	1	1	1	4	yes	no	270	6.92	55.1	88	10.9	-23.7	no	9.7	88	1	9.2	112	1	4.1	97.2	0.8	4	105	0.7	no	5	6	0
9	standard	60	male	no	no	no	no	no	no	no	no	no	no	no	no	Asystole	20	asphyxia	180	120	1	1	1	5	no	no	263	7.3	32.4	47	15.7	-9.8	yes	6.6	91	0.8	7.3	119.1	0.3	7.7	134.5	0.3	5.2	120.5	0.3	yes	4	5	12
10	standard	67	female	no	no	no	no	no	no	no	no	no	no	no	no	PEA	35	cardiac	59	33	1	1	1	13	no	no	286	7.22	42.7	85	17.3	-10.1	no	5	85	0.7	1.8	130.4	0.6	1.8	142.6	0.6	1.2	75.1	0.5	yes	4	5	0
11	standard	30	male	no	no	no	no	no	no	no	no	no	no	yes	no	Asystole	53	trauma	79	35	1	1	1	13	yes	no	246	6.37	158.5	79	9	-3.5	no	21.6	79	1										no	5	6	0
12	NMB	74	male	no	no	no	no	no	no	no	no	no	no	no	no	PEA	49	cardiac	125	72	1	1	1	10	no	no	334	7.17	45.8	100	16.9	-12.6	no	7.7	308	1	3.5	140.8	0.8	3	76.1	0.6	2.3	68.4	0.8	no	5	6	0
13	standard	32	male	no	no	no	no	no	no	no	no	no	no	yes	yes	Asystole	42	trauma	110	84	1	1	1	12	no	no	141	6.85	65.5	174	11.7	-23.9	no	14.2	174	1	7.1	224.6	0.8	4.2	80.9	0.6	5.2	124.2	0.6	yes	4	5	0
14	standard	71	male	yes	no	no	no	yes	yes	no	yes	no	no	yes	yes	Asystole	24	cardiac	178	124	1	1	1	9	no	no	115	7.46	25.6	93	17.7	-5.3	yes	6.5	322	1	3.2	239.1	0.5	1.9	154.2	0.4	1.5	138.8	0.4	no	5	6	0
15	NMB	78	female	no	no	no	no	yes	yes	no	no	no	no	yes	yes	Asystole	40	cardiac	170	120	1	1	1	15	yes	yes	163	6.862	34.6	211	5.9	-24.6	no	17	79	0.8										no	5	6	0
16	NMB	72	male	no	no	no	no	yes	no	no	no	no	no	yes	yes	Asystole	32	other medical	92	42	1	1	1	0	yes	no	180	6.85	68.3	99	11.7	-21.5	no	27.6	94	0.4	16.2	55.6	0.5	12.5	90.6	0.5	8.2	135.2	0.5	yes	4	5	0
17	NMB	77	female	no	no	no	no	yes	no	yes	no	no	no	yes	no	Asystole	41	other medical	140	90	1	1	1	4	yes	no	88	7.253	46.2	58	21	-7.4	no	9.3	58	0.6	4.3	41.8	1	1.1	39.5	1	0.7	63.4	1	no	5	6	0
18	standard	55	male	no	no	no	yes	yes	no	no	no	no	no	no	no	Asystole	29	other	55	36	1	1	1	4	yes	no	238	6.557	179.3	108	15.6	-27.3	no	6.7	108	1		97	1							no	5	6	0
19	NMB	54	male	no	no	no	no	no	no	yes	no	no	no	yes	yes	PEA	19	other medical	138	70	1	1	1	16	no	no	254	6.965	143.8	37	32	-1.9	no	9.1	37	1	1.4	79.9	0.6	1.4	138.5	0.7	2	81	0.7	no	5	6	0
20	standard	75	male	no	no	no	no	yes	yes	no	no	yes	no	no	yes	PEA	36	hanging	83	59	1	1	1	16	yes	no	305	7.196	36.7	328	14.7	-13.9	no	8	38	0.8	6.9	103.3	0.5	8.3	73.1	0.5				no	5	6	0
21	NMB	24	male	no	no	no	no	no	no	no	no	no	no	yes	yes	Asystole	43	other medical	129	40	1	1	1	1	no	no	21	6.827	31.4	140	5.1	-28.8	no	8.9	140	1										no	5	6	0
22	standard	18	male	no	no	no	no	no	no	no	no	no	no	yes	yes	unknonw	19	other	100	40	1	2	5	9	no	no	98	7.187	33.3	57	12.5	-14.9	no	6.8	57	0.2	3.2	177.9	0.5	2.2	114.6	0.3	1.8	128	0.3	yes	1	0	60
23	NMB	46	male	no	no	no	no	no	yes	no	no	no	yes	no	yes	Asystole	40	hanging	56	31	1	1	1	4	no	no	294	7.026	53.9	183	13.8	-17.3	no	8.5	101	1	3	89.6	0.8	2.5	83.2	1	2.8	77.2	1	no	5	6	0
24	standard	61	male	no	no	no	no	no	no	no	no	no	no	no	no	Vf	37	cardiac	94	62	1	1	1	2	yes	yes	334	6.71	81.6	59	10.2	-27.2	no	12.6	108	1	4.7	84.4	0.3	3.6	91.9	0.3	2.4	83.5	0.3	no	5	6	0
25	NMB	68	male	no	yes	yes	no	yes	no	no	no	no	no	no	yes	Vf	53	cardiac	110	70	1	1	1	9	yes	no	303	7.38	41	318	24.3	-0.8	yes	2.6	274	0.6	1.6	198	0.4	2	186	0.4	1.8	160	0.4	yes	4	5	2
26	standard	61	male	no	no	no	no	no	no	no	no	no	yes	no	yes	Vf	21	cardiac	90	60	1	1	1	13	yes	no	242	7.1	53	227	14.5	-13.2	yes	7.6	227	0.7	2.7	159	0.5	9.8	141	0.4	7.6	90	0.4	yes	4	5	0
27	standard	67	female	yes	no	no	no	yes	yes	no	yes	no	no	yes	no	Unknown non-shockable	16	cardiac	190	100	1	1	1	17	yes	no	162	7.02	44	85	9.8	-19.1	no	3.2	85	1	1.1	80	0.8	1.6	175	0.6	2.4	160	0.4	yes	1	0	58
28	NMB	76	female	no	no	no	no	yes	no	no	no	no	no	yes	no	Vf	18	cardiac	80	40	1	1	1	12	yes	no	319	7.05	40	64	9.8	-19.4	no	7.8	64	0.7	2.2	124	0.5	1.7	139	0.4	1.7	86	0.5	yes	1	0	60
29	NMB	43	male	no	no	no	no	yes	no	no	no	no	no	yes	yes	Vf	15	cardiac	100	60	1	1	4	7	yes	yes	120	7.32	41	228	21.3	-5	no	3.3	121	0.7	2	117	0.5	0.9	81	0.6	1.8	130	0.7	yes	1	0	60
30	standard	64	female	no	no	no	no	yes	no	no	no	no	no	no	no	Vf	75	other medical	100	50	1	1	1	11	yes	no	390	7.24	26	169	13.5	-16.3	yes	10.8	169	0.6	3.8	121	0.4	5	64	0.5	5.7	69	0.8	no	5	6	0
31	standard	66	female	no	no	no	no	no	yes	no	yes	no	no	yes	yes	Unknown non-shockable	45	cardiac	180	100	1	1	1	17	yes	no	660	7.17	34	98	13.2	-16.1	no	11.7	79	0.6	5.4	162	0.8	9.4	70	0.8	13.1	86	0.9	no	5	6	0
32	NMB	69	male	yes	no	no	no	yes	yes	no	no	no	no	yes	yes	Asystole	40	cardiac	120	80	1	1	1	10	yes	no	338	6.99	35	292	7.5	-23	no	15.4	214	0.4	2.9	106	0.4	3.4	122	0.4	5.7	61	0.4	yes	4	5	0
33	NMB	34	male	no	no	no	no	no	no	no	no	no	no	yes	yes	Vf	9	cardiac	141	78	1	1	1	4	no	no	244	7.15	35	117	12	-15.7	no	14	123	0.3	1.4	156	0.3	0.9	114	0.2	1	84	0.3	yes	1	1	60
34	standard	64	male	no	no	no	no	yes	no	no	no	no	yes	yes	yes	unknonw	10	cardiac	133	108	1	1	3	4	no	no	248	7.27	29	98	13	-12		8.6	75	0.3	1.3	96	0.3	0.9	82	0.3	0.5	83	0.4	yes	1	1	60
35	standard	60	female	no	no	no	no	no	yes	no	no	no	no	yes	yes	Asystole	47	cardiac	196	79	1	1	1	10	yes	no	481	6.98	82.4	10	19.3	-12.2	no	3.9	106	0.8	2.7	90.2	0.8	1.8	45.7	0.6	1.7	74.9	0.6	no	5	6	0
37	standard	58	male	no	no	no	no	yes	no	no	no	no	yes	yes	no	unknonw	15	cardiac	140	80	1	1	1	2	yes	no	207	7.18	76	11	28.4	0	yes	4.4	131	1	3.7	20	0.4	0.8	127	0.4	1.3	92	0.4	yes	4	5	0
38	NMB	84	female	no	no	no	yes	yes	yes	no	no	no	no	yes	yes	PEA	22	cardiac	165	83	1	1	1	12	yes	no	285	7.334	35.8	69	19.4	-6.8	no	8.3	75	0.7	4.4	60.6	0.7	3	68.2	0.5	1.7	122.1	0.5	yes	3	4	12
39	NMB	82	male	no	no	no	yes	yes	yes	no	no	no	no	yes	yes	Vf	12	cardiac	140	60	1	1	3	4	yes	yes	268	7.23	50	46	20.9		no	2.1	134	0.4	1.9	139	0.4	0.8	126	0.4	0.9	79	0.4	yes	1	1	60
40	standard	60	male	no	no	no	no	yes	no	yes	no	no	no	no	no	Vf	19	cardiac	110	70	1	1	1	4	yes	no	381	7.33	47	77	24.8	-1.4	yes	3.3	77	0.4	5	130	0.3	8	122	0.7	11.9	79	1	no	5	6	0
41	NMB	65	male	no	no	no	no	no	no	no	no	no	yes	yes	no	PEA	35	cardiac	86	53	1	1	1	4	yes	yes	318	6.92	63	227	12.9	-19.6	no	8.9	84	0.6										no	5	6	0
42	NMB	66	male	no	no	no	no	no	no	yes	no	no	yes	no	no	Asystole	26	other	143	85	1	1	1	11	no	no	282	6.9	84	328	12.7	-21.2	no	10.8	78	0.8	6.1	189	0.5	5.3	109	0.5	2.3	103	0.5	yes	5	6	0
43	standard	53	female	no	no	no	no	no	no	no	no	no	no	yes	no	Asystole	115	other	96	67	3	3	3	17	yes	no	465	6.8	84	87			no	15	68	1	15	48	1	15	37	1				no	5	6	0
44	standard	65	male	no	no	no	no	no	no	no	no	no	no	yes	no	Asystole	35	other	158	81	1	1	1	6	no	no	227	7.28	34	117	16	-9.8	yes	5.6	110	0.3	2.8	129	0.3	3.3	154	0.3	2.4	105	0.3	yes	4	5	0
45	NMB	55	male	no	no	no	no	no	yes	no	no	no	yes	yes	no	Vf	24	cardiac	69	56	1	1	1	9	yes	no	353	7.41	32	70	20.3	-3.4	yes	7.7	309	0.5	8.2	198	0.5	7.5	144	0.4	3.7	123	0.4	yes	4	5	12
46	standard	48	female	no	no	no	no	no	no	no	no	yes	no	yes	yes	Vf	60	other medical	130	80	1	1	1	14	no	no	478	7.59	26	101	24.9	4.3	no	11.8	228	1	3.2	97	0.6	5.3	181	0.6	1.8	80	0.5	no	5	6	0
47	NMB	62	male	no	no	no	no	yes	no	no	no	no	yes	yes	no	Vf	5	cardiac	166	75	1	1	3	4	no	no	164	7.42	28	375	18.2	-4.9	no	6.6	375	1	5	103	0.6	5	167	0.6	3.8	172	0.4	yes	1	1	60
48	NMB	18	male	no	no	no	no	no	no	no	no	no	yes	no	yes	PEA	68	hanging	130	93	2	1	5	4	no	no	200	7.28	38	159	17.9	-8.2	yes	4	181	0.4	4	290	0.4	2.2	108	0.4	1.7	103	0.4	yes	1	0	60
49	standard	38	male	no	no	no	no	yes	no	no	yes	no	no	yes	unknown	Vf	9	cardiac	150	80	1	1	2	1	yes	no	115	7.3	39	80	19.2	-6.7	yes	3.1	222	0.4	1.4	84	0.3	1.3	102	0.3	1.2	77	0.3	yes	1	0	60
50	standard	47	male	no	no	no	yes	no	no	no	no	no	yes	yes	yes	Vf	12	cardiac	140	80	1	1	1	2	yes	no	179	7.15	55	91	19.2	-10	no	7.1	61	0.8	7.4	64	0.5	6.3	112	0.4	3.5	115	0.4	yes	1	1	60
51	NMB	50	female	no	no	no	no	no	no	no	no	no	no	no	unknown	unknonw	9	hanging	150	60	1	1	1	0	no	no	223	7.34	25	249	13.5	-10.4	no	8.7	249	0.4	1.8	156	0.4	0.9	153	0.4	1	151	0.4	yes	2	2	60
52	standard	68	male	no	no	no	no	yes	yes	no	yes	no	no	yes	no	Asystole	38	cardiac	200	120	1	1	1	2	yes	no	232	7.37	28	184	16.2	-9.1	yes	3.6	81	0.4	2.5	73	0.5	2.3	98	0.5	2.1	111	0.4	no	5	6	0
53	standard	76	male	no	no	no	no	yes	no	no	no	no	no	yes	yes	Asystole	70	hanging	50	30	1	1	1	3	yes	no	180	7.11	33	155	10.5	-17.9	no	12.4	155	0.5	7.9	182	0.4	2.1	115	0.3	2.2	94	0.5	no	5	6	0
54	NMB	54	male	no	no	no	yes	yes	yes	no	yes	no	yes	yes	yes	Asystole	45	cardiac	200	100	1	1	1	2	yes	no	255	7.16	62	60	22.1	-7.4	no	3.1	60	0.5	2.1	70	0.6	1	114	0.6	1.2	91	0.6	no	5	6	0
55	NMB	54	male	no	no	no	no	yes	yes	no	no	no	yes	yes	yes	PEA	24	cardiac	180	100	1	1	1	3	yes	no	244	7.16	64	42	22.8	-5.9	yes	1.9	151	0.3	1.2	160	0.3	1.1	109	0.3	1	90	0.3	yes	4	5	2
56	NMB	68	male	no	no	no	no	yes	yes	no	no	no	no	yes	no	PEA	70	other	60	30	1	1	1	4	yes	no	148	7.04	63	74	17	-13.1	no	7.6	74	1	2.8	32	1	4.2	29	1				no	5	6	0
57	standard	53	male	no	no	no	no	no	no	no	no	no	yes	no	no	Vf	23	cardiac	90	60	1	1	1	13	yes	no	362	7.11	35.1	88	11.2	-16.9	yes	3.4	259	1	3.5	65.8	1	1.9	126.6	0.5	1.6	152.3	0.5	yes	4	5	12
58	standard	61	male	no	no	no	no	no	no	no	no	no	no	yes	yes	Vf	17	cardiac	211	117	1	1	1	9	no	no	274	7.18	44.1	81	16.5	-11.2	no	2.2	75	0.8	1.6	146.3	0.4	0.7	124	0.4	0.8	172.9	0.4	yes	1	0	60
59	standard	50	male	no	no	no	no	no	no	no	no	no	yes	yes	no	PEA	37	other	50	27	1	1	1	12	yes	no	235	6.83	104	66	17.5	-18.3	no	11.2	66	1	8.2	166.2	0.4							no	5	6	0
60	NMB	84	male	no	no	no	no	no	no	no	no	no	no	yes	yes	Asystole	15	other medical	64	41	1	1	1	18	yes	no	166	7.04	37.3	164	10.3	-18.5	no	7.8	115	1	5.6	107	0.6		64.7	0.6				no	5	6	0
61	NMB	58	male	yes	no	no	no	no	no	no	no	no	no	yes	yes	Asystole	15	cardiac	200	120	1	1	1	7	no	no	181	7.28	35.6	119	17	-8.2	no	3.9	119	0.5	0.9	122	0.5	0.8	120	0.4	0.9	75.9	0.4	no	5	6	0
62	standard	75	male	no	no	no	no	no	no	no	no	no	yes	no	no	Unknown non-shockable	75	cardiac	60	20	1	1	1	15	yes	yes	265	7.1	45	49	13.1	-15.7	no	9.8	74	1										no	5	6	0
63	standard	60	male	no	no	no	no	no	yes	no	no	no	no	yes	no	Asystole	9	other medical	90	50	1	1	1	4	no	no	307	7.39	36.1	393	21.4	-3.2	no	2.6	393	1	2.2	134.1	0.4	1.3	167.7	0.4	1	105	0.3	yes	2	3	48
64	NMB	81	male	no	no	no	no	no	no	yes	no	no	no	yes	yes	Asystole	8	other	110	60	1	1	1	4	yes	no	180	7.08	84	189	24.9	-6.9	no	4.4	148	0.8	1.6	175	0.4	1.7	124	0.3	1.1	104	0.5	no	5	6	0
65	standard	46	male	no	no	no	no	yes	yes	no	yes	no	no	yes	yes	PEA	8	cardiac	120	80	1	1	1	14	no	no	35	7.27	43	147	19.7	-7.2	no	3.3	185	0.7	1.7	164	0.4	2.1	107	0.4	1.7	119	0.4	yes	1	1	60
66	NMB	49	male	no	no	no	no	no	no	no	no	no	no	yes	yes	Unknown non-shockable	18	cardiac	120	80	2	1	3	10	yes	no	576	6.99	64	110	11.8	-16	no	13.9	113	1	9.9	120	0.5	4.1	128	0.6	2.3	137	0.4	yes	3	4	30
67	standard	64	female	no	no	no	yes	yes	yes	no	no	no	no	yes	no	Vf	26	cardiac	140	80	1	1	1	4	yes	no	241	7.03	45	202	11.9		no	15	52	0.6	6.7	133	0.4	4.4	216	0.4	3.3	161	0.4	yes	4	5	0
68	NMB	47	male	no	no	no	no	no	no	no	no	no	yes	no	no	Asystole	47	asphyxia	60	30	1	1	1	4	yes	no	200	6.97	75	30	17.3	-14.9	yes	11.8	286	0.5	10.9	166	0.4	2.5	124	0.4	1.5	123	0.4	no	5	6	0
69	standard	70	female	no	no	no	no	yes	yes	no	no	no	no	yes	yes	Asystole	35	cardiac	100	50	1	1	1	3	yes	no	421	6.98	46	91	10.8	-19.8	no	7.3	105	1	2.2	69	0.6	1.7	74	0.6	1.5	77	0.6	no	5	6	0
70	NMB	73	female	no	no	no	yes	yes	yes	no	no	no	no	yes	yes	PEA	26	cardiac	180	80	1	1	1	4	yes	no	415	7.3	26	248	12.8	-12.1	no	2.8	192	0.3	1.5	163	0.3	1.2	145	0.3	1.6	115	0.3	yes	4	5	0
71	NMB	38	male	no	no	no	no	no	no	no	no	no	no	no	yes	Asystole	28	hanging	95	40	1	1	1	14	yes	no	288	6.746	135	111	17.4	-23.1	no	22	111	1	6.5	94.5	0.4	3.9	120	0.4	1.6	110	0.3	no	5	6	0
72	standard	77	male	yes	no	no	no	yes	no	no	no	no	yes	yes	no	PEA	24	cardiac	100	50	1	1	1	4	yes	yes	213	6.84	58	41	9.9	-22.8	yes	10.9	41	0.9	7.5	79	0.8	6.7	110	0.8	5.8	144	0.7	no	5	6	0
73	standard	62	male	no	no	no	no	no	no	no	no	no	no	unknown	unknown	PEA	19	trauma	60	40	1	1	1	4	yes	no	155	7.41	35	439	22.2	-2.4	no	1	203	0.5	1.3	155	0.4	1.4	110	0.3	1.7	66	0.4	no	5	6	0
74	NMB	81	male	no	yes	no	no	yes	no	no	yes	no	no	yes	no	Asystole	37	cardiac	160	80	1	1	1	4	yes	no	242	6.9	45	288	8.8	-22.5	yes	8.6	196	0.6	7.6	159	0.7	11.4	38	0.7	11.9	105	80	no	5	6	0
75	NMB	65	female	no	yes	no	no	yes	yes	no	yes	no	no	yes	no	Asystole	6	cardiac	84	48	1	1	1	14	no	no	550	7.337	32.2	80	16.8	-7.7	yes	18	208	0.7	3.2	114	0.6	2.7	118	0.4	2.2	99.3	0.4	yes	4	5	0
76	standard	46	female	no	no	no	no	yes	yes	no	no	no	yes	no	no	Asystole	114	other	170	70	1	1	1	4	yes	no	279	6.82	46	98	7.5	-26.8	no	8.9	109	1	8.9	403	1	6.3	97	1				no	5	6	0
77	NMB	47	male	no	no	no	no	no	no	no	no	no	no	yes	yes	Vf	25	cardiac	150	100	3	1	5	10	yes	no	194	7.07	54	76	12.9	-14.5	no	1.2	119	0.6	1.1	119	0.4	0.9	135	0.3	1	120	0.3	yes	1	0	60
78	standard	61	male	no	no	no	no	no	no	yes	no	no	yes	yes	no	Asystole	17	cardiac	140	80	1	1	1	0	no	yes	249	6.948	71.7	156	15.3	-17.9	yes	3.3	383	1	4.2	119.7	0.4	2.8	136.7	0.4	1.3	121.5	0.4	no	5	6	0
79	standard	23	male	no	no	yes	no	no	no	no	no	no	no	yes	yes	PEA	26	asphyxia	70	40	1	1	1	4	yes	no	290	7.33	33	128	17.3	-7.5	yes	3.6	33	0.8	4.7	196	0.6	3.6	146	0.4	1.6	94	0.3	yes	4	5	0
80	NMB	65	male	no	no	no	no	no	no	no	no	no	yes	yes	no	Asystole	26	cardiac	140	90	1	1	1	10	yes	no	266	7	103	90	18.3	-5.9	yes	3.4	145	0.5	3.5	185	0.4	3	163	0.4	1.8	111	0.3	yes	4	5	0
81	standard	62	male	no	no	no	no	no	no	no	no	no	no	yes	no	Vf	10	cardiac	160	100	3	1	5	4	no	no	197	7.432	28.3	192	19.1	-5.4	no	3.2	279	0.5	1.7	123	0.4	1.1	78	0.5	1	114	0.5	yes	1	0	60
82	NMB	76	male	no	yes	no	no	no	no	no	no	no	no	yes	yes	Unknown non-shockable	10	cardiac	128	72	1	1	1	6	no	no	246	7.39	33	181	20	-5	no	3.2	147	0.4	8.9	208	0.4	7	191	0.4	5.7	91	0.3	yes	1	1	48
83	NMB	68	female	no	no	no	no	yes	no	no	no	no	no	no	yes	Asystole	24	asphyxia	54	33	1	1	1	4	no	no	418	6.89	69.6	160	12.6	-22.7	no	17	160	1	4.9	304	0.6	2.4	167	0.6	1.5	120	0.4	yes	4	5	0
84	standard	82	female	no	yes	no	no	yes	no	no	no	no	no	yes	yes	Asystole	35	other medical	90	49	1	1	1	10	yes	no	217	6.741	83.9	73	11.1	-24.2	no	9.5	73	1										no	5	6	0
85	standard	66	male	no	no	no	no	no	no	no	no	no	no	yes	yes	Vf	75	cardiac	118	37	1	1	3	4	yes	yes	306	7.021	46.4	93	11.5	-20.8	no	14.5	93	0.8	12.4	177	0.6	5.2	72.3	0.6		106	0.7	yes	1	1	60
[truncated: 2 more columns]
